# Supplementary material for: Chromosome Doubling Enhances Biomass and Carotenoid Content in Lycium chinense
Source: MDPI journal article supplement (doi:10.3390/plants13030439), 2024-02-02
Supplement: s1 [file s1]

## Supplementary Material

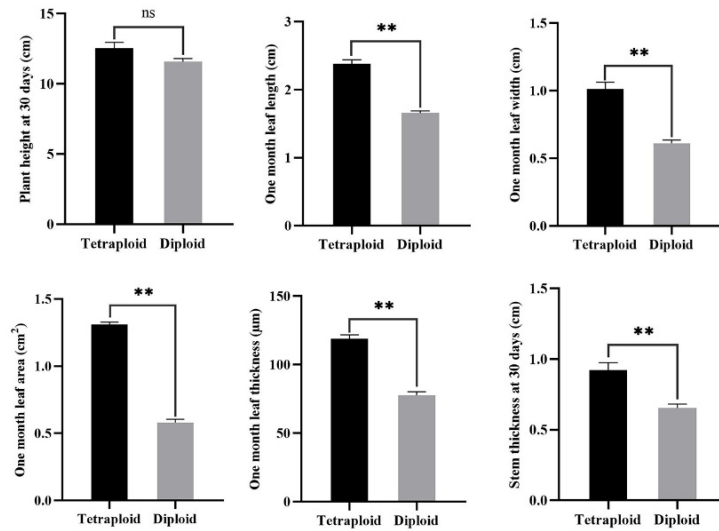

**Supplementary Figure 1.** Statistical analysis (30 days) of plant height, leaf length, leaf width, leaf area, leaf thickness, and stem thickness of diploids and tetraploids *L. chinense*. \*\*for  $P \leq 0.01$ , ns for  $P > 0.05$ .

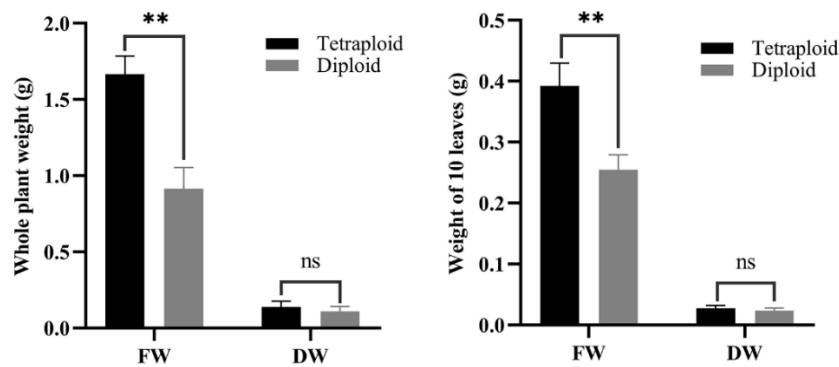

**Supplementary Figure 2.** Statistical analysis of fresh and dry weights of the whole plants and 10 leaves of diploids and tetraploids *L. chinense*. \*\*for  $P \leq 0.01$ , ns for  $P > 0.05$ .

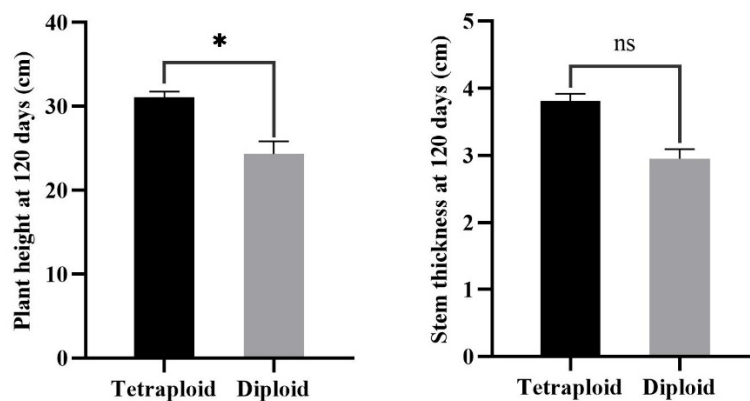

**Supplementary Figure 3.** Statistical analysis (120 days) of plant height and stem thickness of diploids and tetraploids *L. chinense*. \*for  $0.01 < P \leq 0.05$ , ns for  $P > 0.05$ .

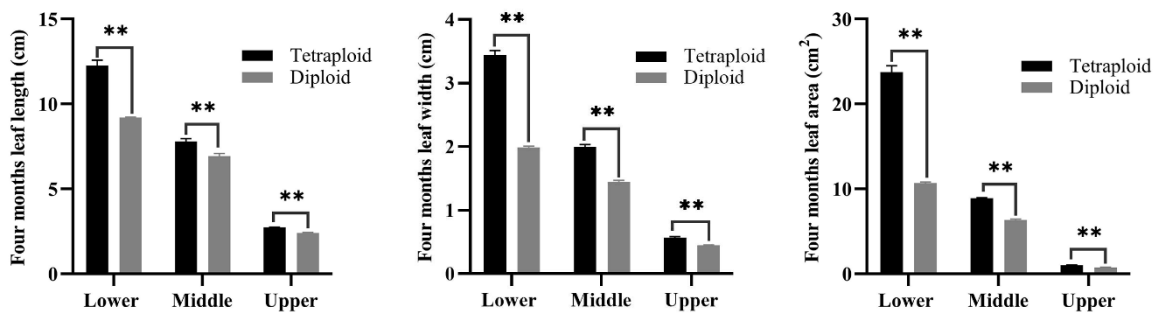

**Supplementary Figure 4.** Statistical analysis (120 days) of leaf length, leaf width, and leaf area of diploids and tetraploids *L. chinense*. \*\*for  $P \leq 0.01$ .
